# Supplementary material for: High transformation of propane in reaction with CO2 to propylene on ZrO2-combined Fe-based catalysts
Source: Royal Society of Chemistry journal article supplement (doi:10.1039/d3cy00915g), 2023-01-01
Supplement: d3cy00915g1.pdf [file d3cy00915g1.pdf]

## Supporting Information

### Catalyst characterization

*Phase measurement* was carried out on a X-ray diffractometer (XRD) (Rigaku D/MAX 2200PC) using Ni-filtered Cu K $\alpha$  radiation at 40 kV and 30 mA. Phase evolution during the OPDH-CO<sub>2</sub> reaction was observed on a Rigaku Smart Lab diffractometer attached an *in situ* cell. Sample of 50 mg was placed into the cell and pretreated at 550 °C for 1 h in a N<sub>2</sub> flow (10 mL·min<sup>-1</sup>). Then, a C<sub>3</sub>H<sub>8</sub>-CO<sub>2</sub> (1:1) flow (20 mL·min<sup>-1</sup>) was switched into and the spectra were recorded each 30 min during the processive 160 min with scanning speed of 0.1 s and step width of 0.01°.

*Micro morphology* was observed on a field emission scanning electron microscope (FESEM) (Czech TESCAN MIRA LMS) at 30 kV and a transmission electron microscope (TEM) (FEI Talos F200X) at 200 kV.

*Texture parameters* were measured on a surface analysis instrument (JW-BK132F) using N<sub>2</sub> physicoadsorption. Sample of 200 mg was degassed at 250 °C for 4 h prior to measurement. The specific surface area was obtained using the Brunauer-Emmett-Teller(BET) model. Pore volume and distribution were obtained using the Barrett-Joyner-Halenda (BJH) model.

*CO<sub>2</sub>/C<sub>3</sub>H<sub>8</sub> temperature-programmed desorption (CO<sub>2</sub>/C<sub>3</sub>H<sub>8</sub>-TPD)* was carried out on a chemisorption instrument (Micromeritics AutoChem II 2920). Sample of 50 mg was placed into a U-shaped quartz tube and pretreated at 350 °C for 1 h in a He flow (30 mL·min<sup>-1</sup>). Then the sample was cooled down to 50 °C and adsorbed CO<sub>2</sub>/C<sub>3</sub>H<sub>8</sub> (30 mL·min<sup>-1</sup>) for 30 min. Next, the sample was purged by the He flow for 1 h. Subsequently, as the temperature rose to 800 °C at a rate of 10 °C·min<sup>-1</sup> the desorption of CO<sub>2</sub> was recorded using TCD. For *H<sub>2</sub> temperature-programmed reduction (H<sub>2</sub>-TPR)*, sample of 50 mg was loaded into the quartz tube followed by pretreatment at 300 °C for 1 h, and cooled down to ambient temperature in the He flow. Then, the H<sub>2</sub> consumed was recorded in a 10% H<sub>2</sub>/Ar flow (30 mL·min<sup>-1</sup>) as the temperature rose to 800 °C at 10 °C·min<sup>-1</sup>.

*Surface element valence analysis* was performed using X-ray photoelectron spectroscopy (XPS) (Thermo Scientific K-Alpha spectrometer) using Al K $\alpha$  X-ray radiation source. The base pressure of the chamber was less than 5×10<sup>-8</sup> Pa. The binding energy (B.E.) was calibrated to adventitious carbon using the C1s peak at 284.8 eV.

*NH<sub>3</sub> temperature-programmed desorption (NH<sub>3</sub>-TPD)* was performed on a TP-5080 adsorption instrument. Sample of 50 mg was pretreated in a He flow (30 mL·min<sup>-1</sup>) at 550 °C for 1 h and then cooled down to ambient temperature. Then NH<sub>3</sub> was adsorbed at 100 °C for 30 min followed by purge in the He flow for 0.5 h. The desorption of NH<sub>3</sub> was recorded using TCD as the temperature was raised from ambient temperature to 600 °C at 10 °C·min<sup>-1</sup>.

*Thermogravimetric (TG) analysis* of the used catalyst samples was carried out on a thermogravimetric analyzer (NETZSCH STA 449). Sample of 20 mg was heated from ambient temperature to 800 °C at a rate of 20 °C·min<sup>-1</sup> in an air flow (30 mL·min<sup>-1</sup>) and the weight was synchronously recorded.

Raman spectra were recorded on a HORIBA Scientific LabRAM HR Evolution spectrophotometer equipped with a solid state laser (532 nm wave-length, 17 mW capacity) as the excitation source and a 5x objective lens. Spectra were collected at ambient temperature in the wave number range of 100–2000  $\text{cm}^{-1}$ .

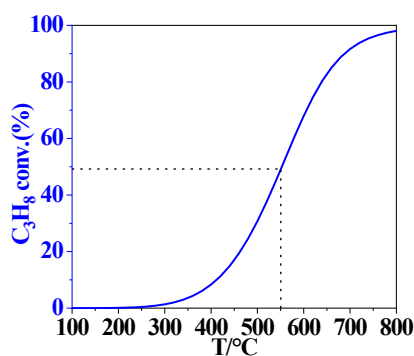

Fig. S1 Equilibrium conversions of OPDH-CO<sub>2</sub> reaction.

CO<sub>2</sub>/C<sub>3</sub>H<sub>8</sub>=1, 0.1 MPa.

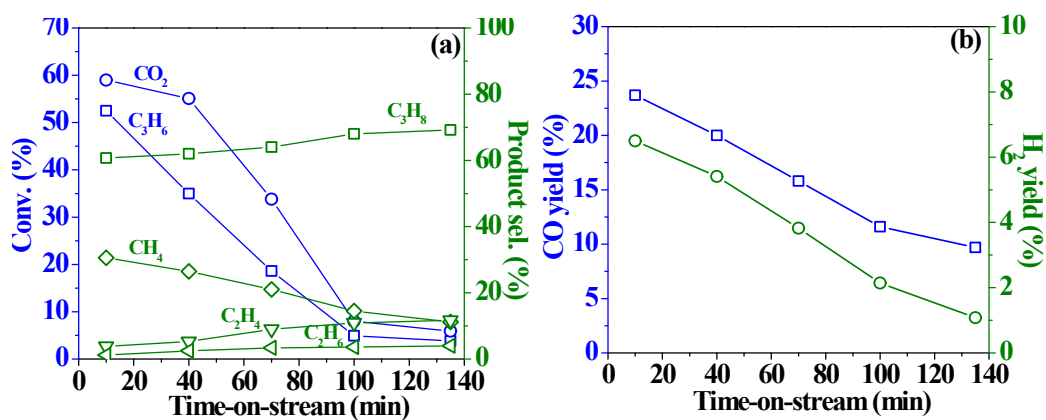

Fig. S2 C<sub>3</sub>H<sub>6</sub> reaction with CO<sub>2</sub> on Fe<sub>2</sub>O<sub>3</sub>-3ZrO<sub>2</sub>.

C<sub>3</sub>H<sub>6</sub> (CO<sub>2</sub>) conv. and product sel. (a); CO (H<sub>2</sub>) yield (b)

C<sub>3</sub>H<sub>6</sub>/CO<sub>2</sub>/Ar=1/1/1.5, W/F=12.5 g·h·mol<sup>-1</sup>, 550 °C and 0.1 MPa.

Table S1 Reported catalytic activity for OPDH-CO<sub>2</sub>

| Cats                                                           | T<br>(°C) | n(CO <sub>2</sub> )/<br>n(C <sub>3</sub> H <sub>8</sub> ) | WHSV/<br>g <sub>C<sub>3</sub>H<sub>8</sub></sub><br>g <sub>cat</sub> <sup>-1</sup> h <sup>-1</sup> | C <sub>3</sub> H <sub>8</sub><br>conv.<br>(%) | CO <sub>2</sub><br>conv.<br>(%) | C <sub>3</sub> H <sub>6</sub><br>sel.<br>(%) | STY/<br>mol <sub>C<sub>3</sub>H<sub>6</sub></sub><br>kg <sub>cat</sub> <sup>-1</sup> h <sup>-1</sup> | Ref.         |
|----------------------------------------------------------------|-----------|-----------------------------------------------------------|----------------------------------------------------------------------------------------------------|-----------------------------------------------|---------------------------------|----------------------------------------------|------------------------------------------------------------------------------------------------------|--------------|
| Cr <sub>2</sub> O <sub>3</sub> /SiBeta                         | 550       | 5                                                         | 1.2                                                                                                | 24.8                                          | 4.0                             | 87.1                                         | 6.2                                                                                                  | 1            |
| Cr-O/Al <sub>2</sub> O <sub>3</sub>                            | 550       | 5                                                         | 1.2                                                                                                | 12.9                                          | -                               | 88.3                                         | 3.3                                                                                                  | 2            |
| Cr <sub>2</sub> O <sub>3</sub> -ZrO <sub>2</sub>               | 550       | 2                                                         | 0.3                                                                                                | 51.1                                          | -                               | 81.7                                         | 2.9                                                                                                  | 3            |
| CrO <sub>x</sub> /SBA-15                                       | 550       | 2                                                         | 0.3                                                                                                | 24.2                                          | -                               | 83.9                                         | 1.5                                                                                                  | 4            |
| CrO <sub>x</sub> /SiO <sub>2</sub>                             | 600       | 4                                                         | 1.2                                                                                                | 70                                            | 15.3                            | 79                                           | 15.8                                                                                                 | 5            |
| Ga <sub>2</sub> O <sub>3</sub> -Al <sub>2</sub> O <sub>3</sub> | 500       | 2                                                         | 0.15                                                                                               | 49.7                                          | -                               | 91.7                                         | 1.6                                                                                                  | 6            |
| Ga <sub>2</sub> O <sub>3</sub> -ZSM-48                         | 600       | 2                                                         | 0.3                                                                                                | 52.6                                          | -                               | 42.2                                         | 1.6                                                                                                  | 7            |
| In <sub>2</sub> O <sub>3</sub> -Al <sub>2</sub> O <sub>3</sub> | 600       | 4                                                         | 0.15                                                                                               | 35                                            | 10.0                            | 75                                           | 0.9                                                                                                  | 8            |
| In <sub>2</sub> O <sub>3</sub> /Al <sub>2</sub> O <sub>3</sub> | 600       | 4                                                         | 0.15                                                                                               | 14                                            | 11.0                            | 80                                           | 0.4                                                                                                  | 9            |
| V-MCM-41                                                       | 600       | 4                                                         | 1.0                                                                                                | 58                                            | 10.5                            | 90                                           | 12.4                                                                                                 | 10           |
| V <sub>2</sub> O <sub>5</sub> -Cr <sub>2</sub> O <sub>3</sub>  | 550       | 1/3                                                       | 3.5                                                                                                | 9.9                                           | 5.0                             | 95.9                                         | 7.9                                                                                                  | 11           |
| V <sub>2</sub> O <sub>5</sub> -MoO <sub>3</sub>                | 550       | 1/3                                                       | 3.5                                                                                                | 10.1                                          | 3.3                             | 96.0                                         | 8.1                                                                                                  | 11           |
| Fe <sub>3</sub> Ni <sub>1</sub> /CeO <sub>2</sub>              | 550       | 1                                                         | 11.8                                                                                               | 2.7                                           | 4.0                             | 58.2                                         | 3.9                                                                                                  | 12           |
| 5FeCeO <sub>2</sub>                                            | 550       | 1                                                         | 0.59                                                                                               | 9.50                                          | 11.0                            | 39.0                                         | 0.5                                                                                                  | 13           |
| Fe <sub>2</sub> O <sub>3</sub> -3ZrO <sub>2</sub>              | 550       | 1                                                         | 1.1                                                                                                | 39.9                                          | 28.2                            | 83.7                                         | 8.7                                                                                                  | this<br>work |

T---reaction temperature; STY---space time yield. STY--- calculated using the literatruue data.

## References

- 1 P. Michorczyk, K. Zeńczak-Tomera, B. Michorczyk, A. Węgrzyniaka, M. Bastaa, Y. Millotb, L. Valentinb and S. Dzwigajb, *J CO<sub>2</sub> Utiliz.*, 2020, **36**, 54–63.
- 2 P. Michorczyk, K. Zeńczak, R. Niekurzak and J. Ogonowski, *Polish J Chem. Technol.*, 2012, **14**, 77–82.
- 3 R. Wu, P. Xie, Y. Cheng, Y. Yue, S. Gu, W. Yang, C. Miao, W. Hua and Z. Gao, *Catal. Commun.*, 2013, **39**, 20–23.
- 4 X. Zhang, Y. Yue and Z. Gao, *Catal. Lett.*, 2002, **83**, 19–25.
- 5 H. M. Wang, Y. Chen, X. Yan, W. Z. Lang and Y. J. Guo, *Microporous Mesoporous Mater.*, 2019, **284**, 69–77.
- 6 M. Chen, J. Xu, Y. M. Liu, Y. Cao, H. Y. He, J. H. Zhuang and K. N. Fan, *Catal. Lett.*, 2008, **124**, 369–375.
- 7 Y. Ren, J. Wang, W. Hua, Y. Yue and Z. Gao, *J. Ind. Eng. Chem.*, 2012, **18**, 731–736.
- 8 M. Chen, J. Xu, Y. Cao, H. Y. He, K. N. Fan and J. H. Zhuang, *J. Catal.*, 2010, **272**, 101–108.
- 9 M. Chen, J. L. Wu, Y. M. Liu, Y. Cao, L. Guo, H. Y. He and K. N. Fan, *Appl. Catal., A*, 2011, **407**, 20–28
- 10 Z. F. Han, X. L. Xue, J. M. Wu, W. Z. Lang and Y. J. Guo, *Chin. J. Catal.*, 2018, **39**, 1099–1109.
- 11 A. S. Sandupatla, K. Ray, P. Thaosen, C. Sivanada and G. Deo, *Catal. Today*, 2020, **354**, 176–182.
- 12 E. Gomez, S. Kattel, B. Yan, S. Yao, P. Liu and J. G. Chen, *Nat. Commun.*, 2018, **9**, 1398.
- 13 H. Wang and G. Tsilomelekis, *Catal. Sci. Technol.*, 2020, **10**, 4362–4372.

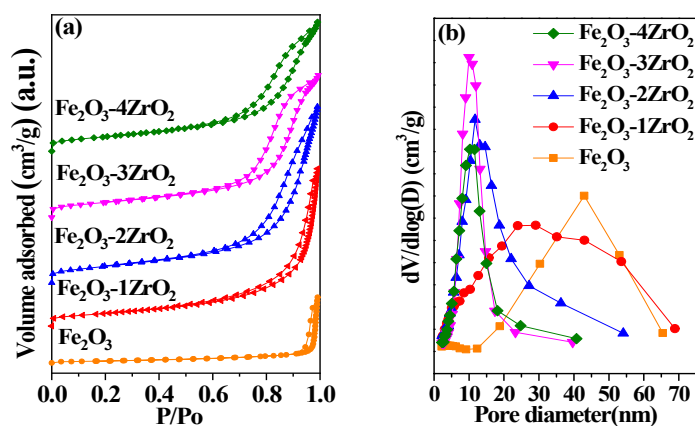

Fig. S3. N<sub>2</sub> adsorption-desorption isotherms (a) and pore distribution (b).

Table S2 Texture parameters of fresh catalysts

| Catalysts                                         | Specific surface area (m <sup>2</sup> ·g <sup>-1</sup> ) | Cumulative pore volume (cm <sup>3</sup> ·g <sup>-1</sup> ) | Average pore diameter(nm) |
|---------------------------------------------------|----------------------------------------------------------|------------------------------------------------------------|---------------------------|
| Fe <sub>2</sub> O <sub>3</sub> -4ZrO <sub>2</sub> | 56.8                                                     | 0.23                                                       | 11.5                      |
| Fe <sub>2</sub> O <sub>3</sub> -3ZrO <sub>2</sub> | 63.9                                                     | 0.30                                                       | 10.9                      |
| Fe <sub>2</sub> O <sub>3</sub> -2ZrO <sub>2</sub> | 57.4                                                     | 0.29                                                       | 12.6                      |
| Fe <sub>2</sub> O <sub>3</sub> -1ZrO <sub>2</sub> | 49.1                                                     | 0.27                                                       | 15                        |
| Fe <sub>2</sub> O <sub>3</sub>                    | 8.1                                                      | 0.11                                                       | 29.7                      |

Table S3 Surface element composition of fresh catalysts<sup>a</sup>

| Catalysts                                         | Fe (wt.%) | Zr (wt.%) | O (wt.%) | Zr/Fe (molar ratio) | Zr/Fe (nominal molar ratio) |
|---------------------------------------------------|-----------|-----------|----------|---------------------|-----------------------------|
| Fe <sub>2</sub> O <sub>3</sub> -4ZrO <sub>2</sub> | 6.56      | 23.23     | 70.21    | 2.07                | 2.00                        |
| Fe <sub>2</sub> O <sub>3</sub> -3ZrO <sub>2</sub> | 8.20      | 22.10     | 69.70    | 1.58                | 1.50                        |
| Fe <sub>2</sub> O <sub>3</sub> -2ZrO <sub>2</sub> | 11.46     | 19.55     | 68.99    | 1.03                | 1.00                        |
| Fe <sub>2</sub> O <sub>3</sub> -1ZrO <sub>2</sub> | 17.34     | 14.59     | 68.07    | 0.52                | 0.50                        |
| Fe <sub>2</sub> O <sub>3</sub>                    | 36.02     | /         | 63.98    | /                   | /                           |

<sup>a</sup> Calculated from XPS measurement results.

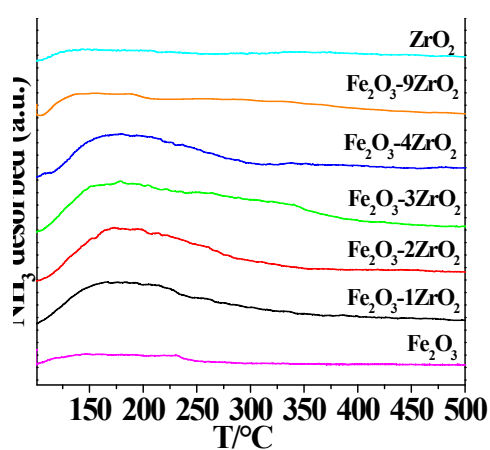

Fig. S4 NH<sub>3</sub>-TPD profiles of fresh catalysts.

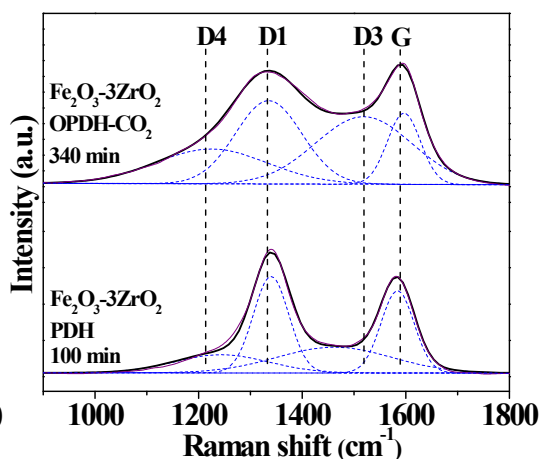

Fig. S5 Raman spectra of used catalysts.
